# Supplementary material for: Atmospheric Deposition of Polycyclic Aromatic Hydrocarbons (PAHs) in the Coastal Urban Environment of Poland: Sources and Transport Patterns
Source: Int J Environ Res Public Health. 2022 Oct 30;19(21):14183. doi: 10.3390/ijerph192114183 (PMC9657786; doi:10.3390/ijerph192114183)
Supplement: Supplementary file 1 [file ijerph-19-14183-s001.zip › ijerph-1990120-supplementary.pdf]

*Supplement of*

# **Atmospheric Deposition of Polycyclic Aromatic Hydrocarbons (PAHs) in the Coastal Urban Environment of Poland: Sources and Transport Patterns**

**\* Patrycja Siudek**

Correspondence to: \*Patrycja Siudek (patrycja.siudek@imgw.pl)

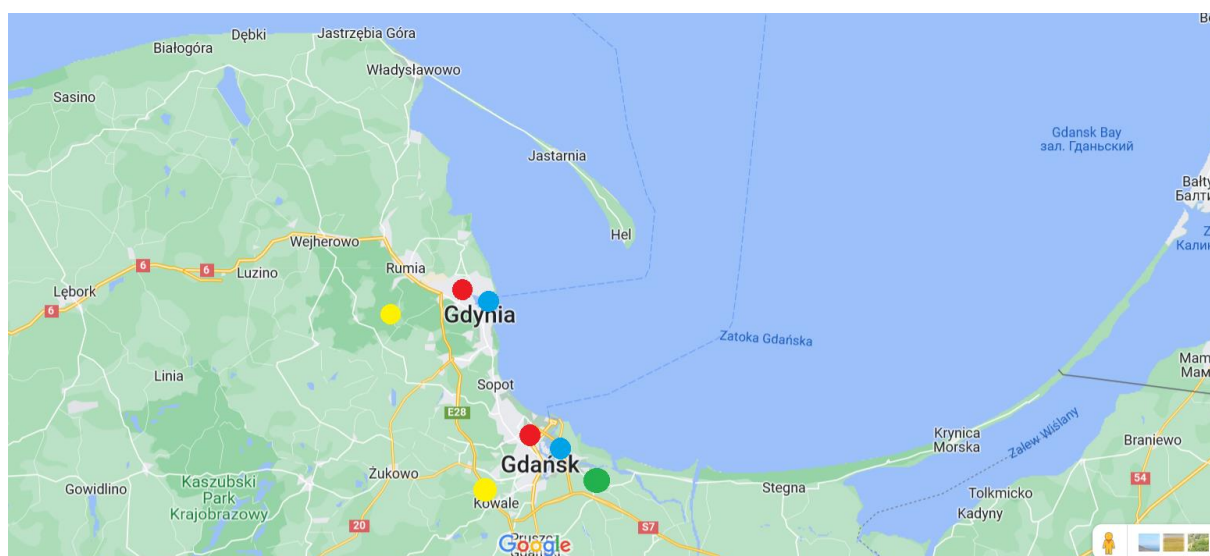

**Figure S1.** PM<sub>2.5</sub> sampling site in Gdynia, Poland. Dots represent major local/regional PAH sources, i.e. coal-fired power plant (red), port and docks area (blue), petrochemical refinery and plants (green), and municipal solid waste recycling units (yellow).

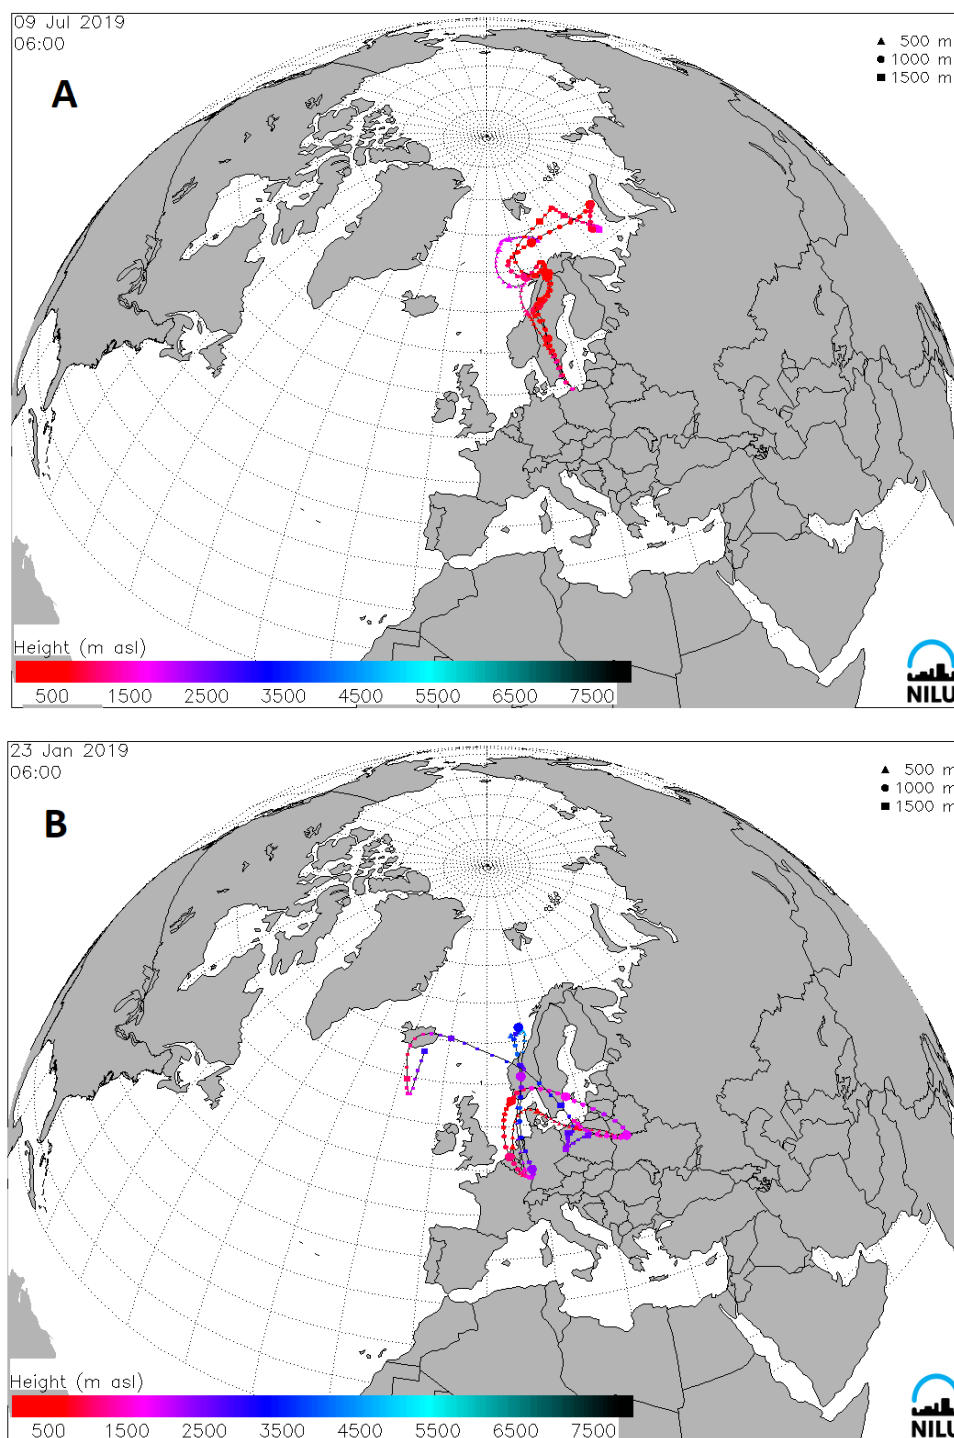

**Figure S2.** An example of 24-h backward trajectory simulation over the study domain. A chosen day with (A) low deposition fluxes ( $17.6 \text{ ng m}^{-2} \text{ day}^{-1}$ , precipitation amount of 21.0 mm) in the non-heating study period and (B) high deposition fluxes ( $2278 \text{ ng m}^{-2} \text{ day}^{-1}$ , precipitation amount of 0.01 mm) in the heating season. Results were obtained from the FLEXTRA model.

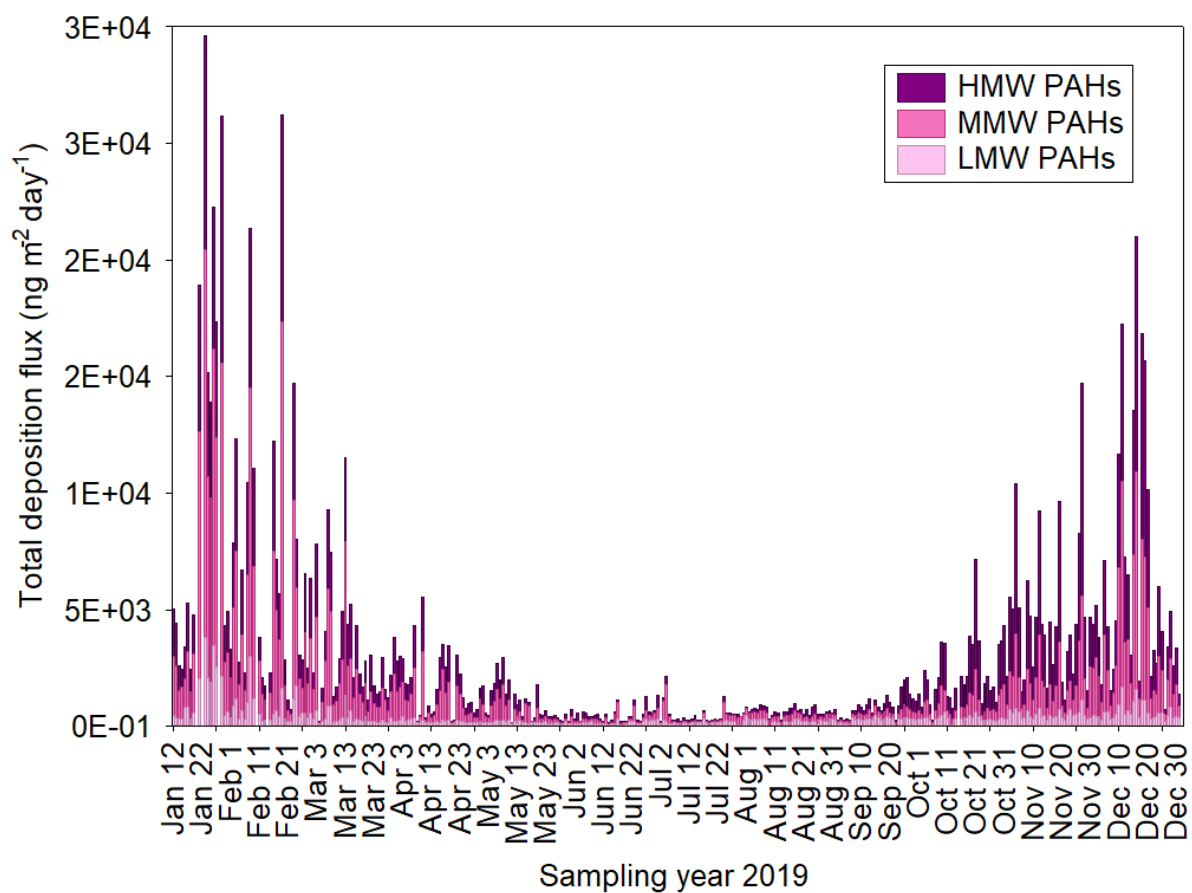

**Figure S3.** Daily variability of deposition fluxes of low-, medium-, and high-molecular-weight PAHs during the PM<sub>2.5</sub> measurements in 2019.

**Table S1.** Statistical parameters for PM<sub>2.5</sub> mass concentration and meteorological variables in Gdynia, 2019.

| <b>Meteorological parameter (unit)</b>                     | <b>Mean</b> | <b>SD</b> | <b>Min</b> | <b>Max</b> |
|------------------------------------------------------------|-------------|-----------|------------|------------|
| Air temperature (°C)                                       | 9.54        | 6.75      | −6.60      | 25.20      |
| Air pressure (hPa)                                         | 1011        | 10.06     | 980        | 1048       |
| Relative humidity (%)                                      | 77.56       | 10.12     | 45.30      | 98.20      |
| Precipitation height (mm)                                  | 1.49        | 3.67      | 0.01       | 29.9       |
| PM <sub>2.5</sub> mass concentration (µg m <sup>−3</sup> ) | 24.26       | 22.52     | 167.24     | 1.72       |
